# Supplementary material
Source: PubMed Central journal article supplement (PMC6071411)
Supplement: NIHMS980303-supplement-SI.pdf [file NIHMS980303-supplement-SI.pdf]

## Supporting Information for:

### Designing Well-Structured Cyclic Pentapeptides Based on Sequence–Structure Relationships

Diana P. Slough,<sup>‡1</sup> Sean M. McHugh,<sup>‡1</sup> Ashleigh E. Cummings,<sup>1</sup> Peng Dai,<sup>2</sup> Bradley L. Pentelute,<sup>2</sup> Joshua A. Kritzer,<sup>1</sup> Yu-Shan Lin<sup>\*1</sup>

<sup>1</sup>Department of Chemistry, Tufts University, Medford, Massachusetts 02155, USA

<sup>2</sup>Department of Chemistry, Massachusetts Institute of Technology, Cambridge, Massachusetts 02139, USA

<sup>‡</sup>These authors contributed equally.



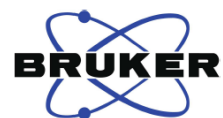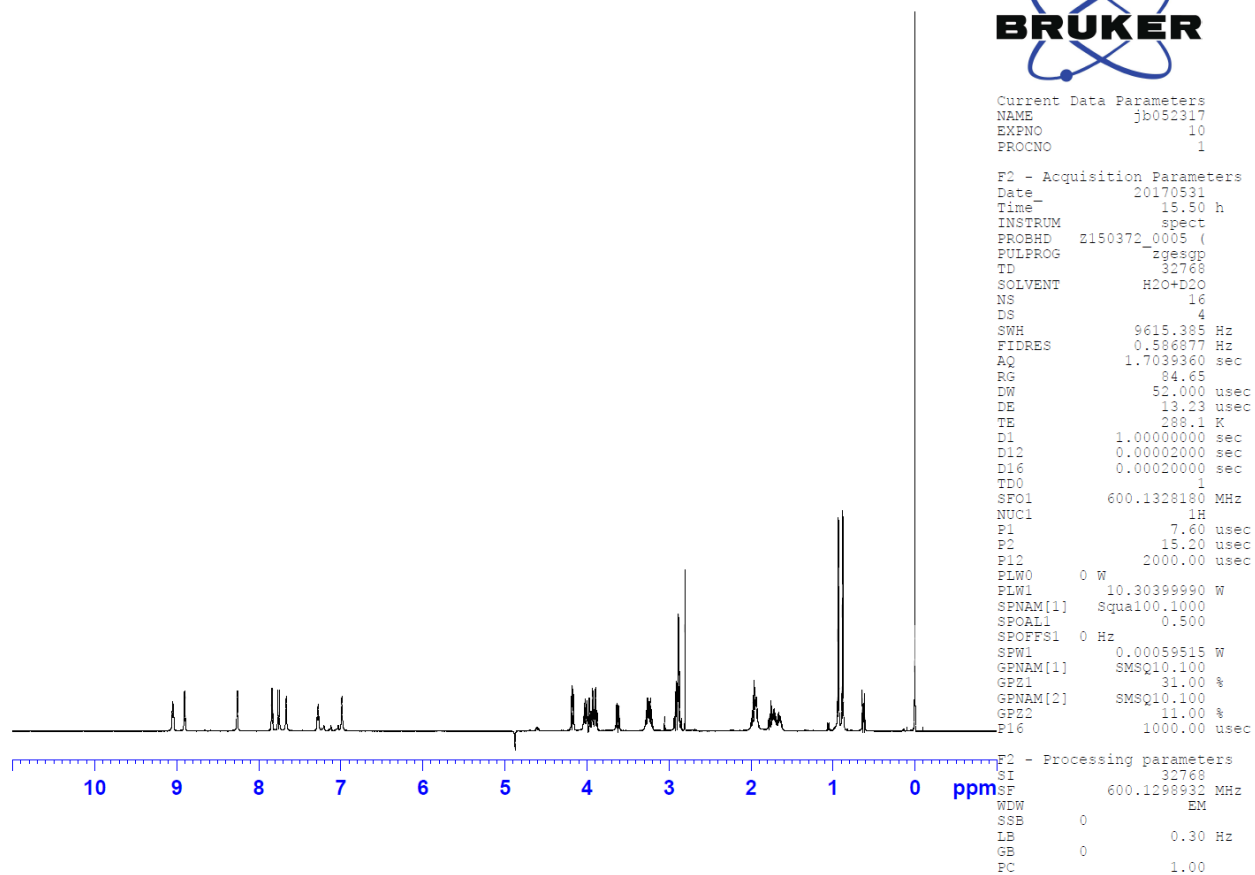

**Figure S2.**  $^1\text{H}$  NMR spectrum of cyclo-(GNSRV) in  $\text{H}_2\text{O}:\text{D}_2\text{O}$  (90:10) at 288 K.

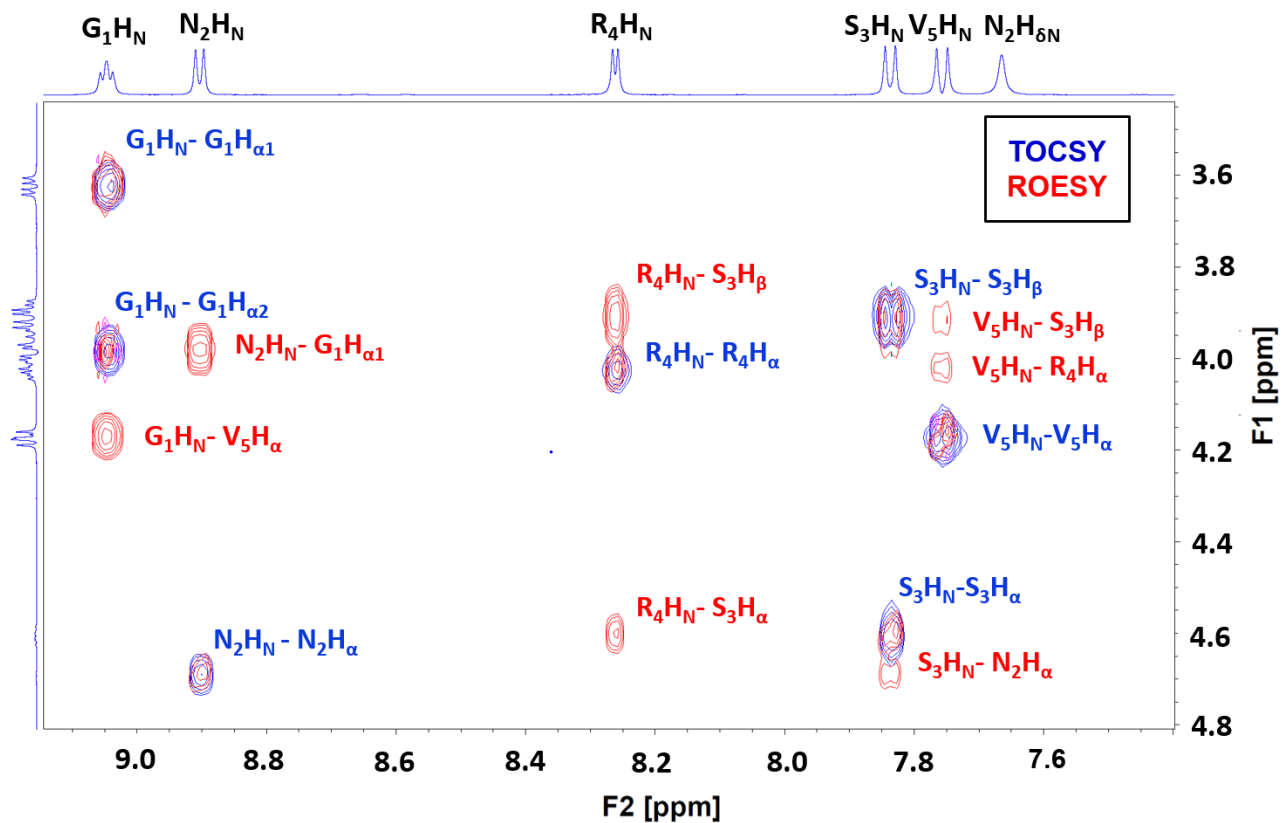

**Figure S3.** Fingerprint region of the 2D spectra for cyclo-(GNSRV). TOCSY peaks are shown in blue and ROESY peaks shown in red. 1D spectra correspond to the  $H_N$  region (**top**) and the  $H_\alpha$  region (**left side**). The peptide was dissolved in  $H_2O:D_2O$  (90:10) at a concentration of 3.5 mM at 288 K.

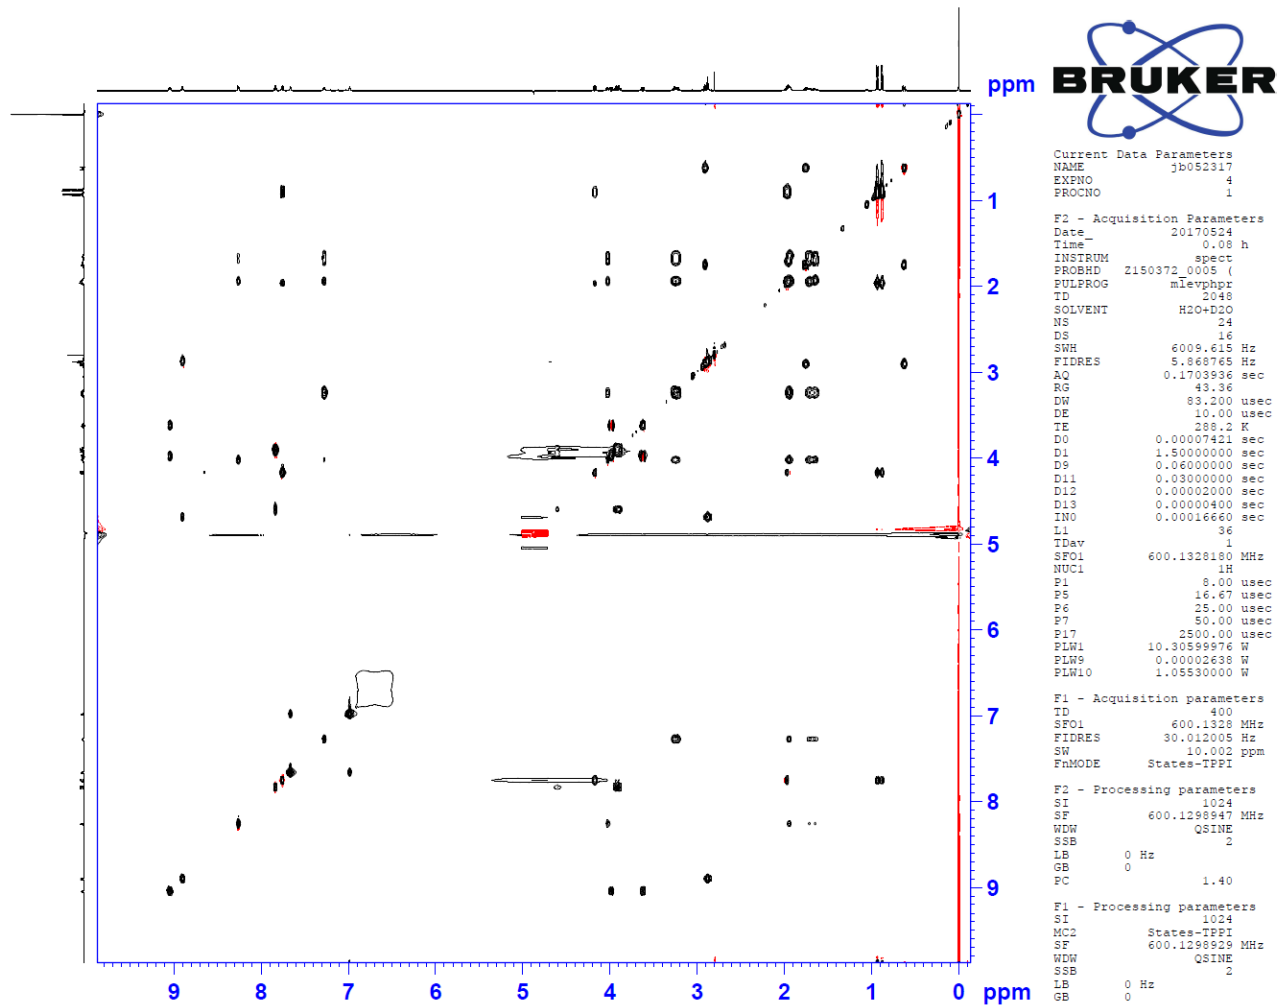

**Figure S4.** Full  $^1\text{H}$ - $^1\text{H}$  TOCSY spectrum of cyclo-(GNSRV) in  $\text{H}_2\text{O}:\text{D}_2\text{O}$  (90:10) at 288 K.

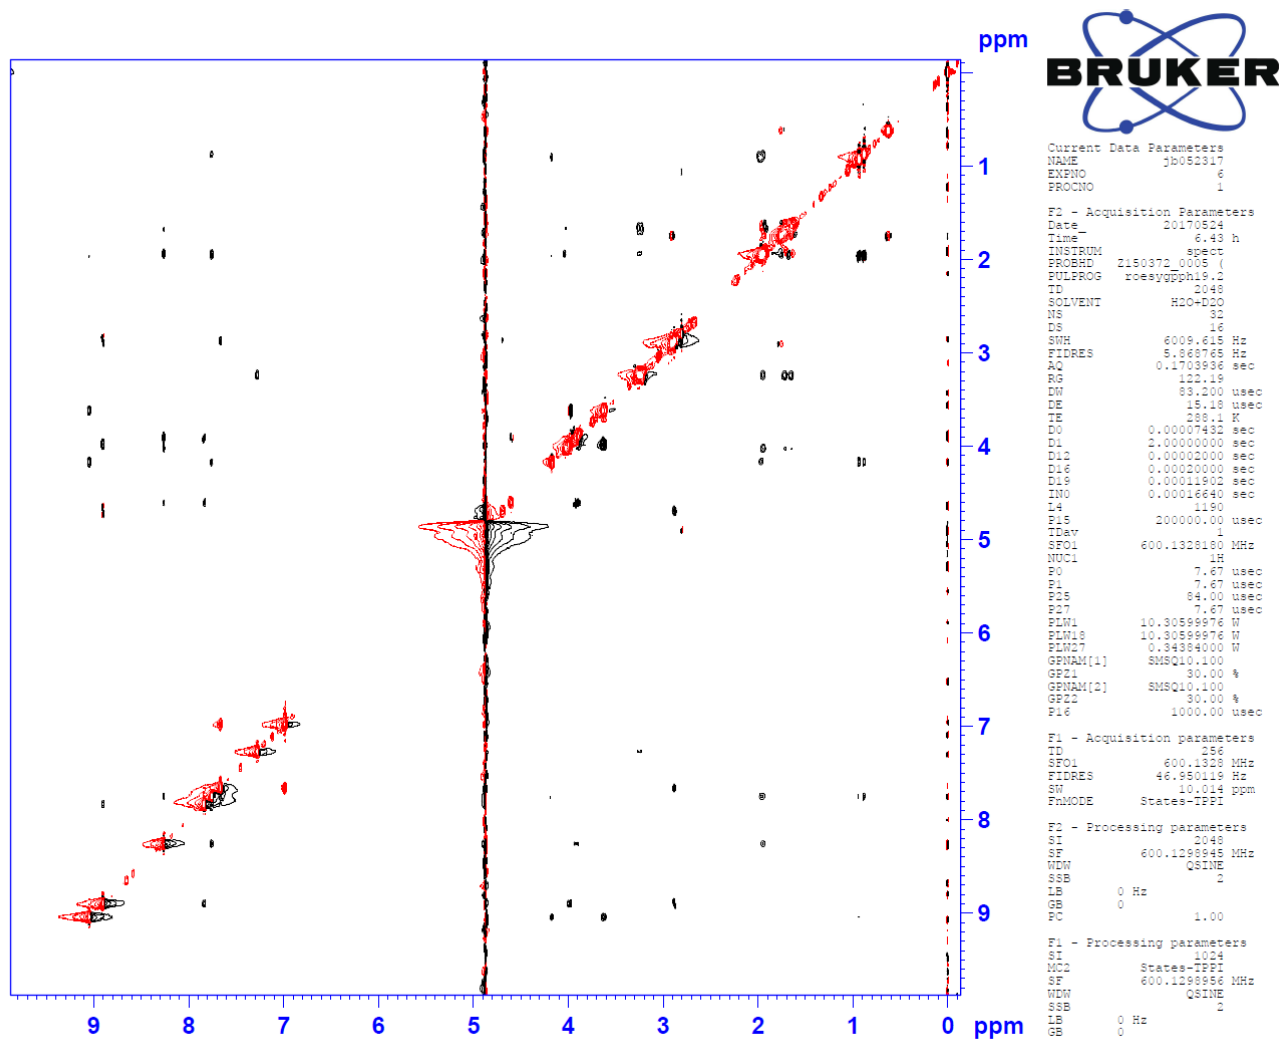

**Figure S5.** Full  $^1\text{H}$ - $^1\text{H}$  ROESY spectrum of cyclo-(GNSRV) in  $\text{H}_2\text{O}:\text{D}_2\text{O}$  (90:10) at 288 K.

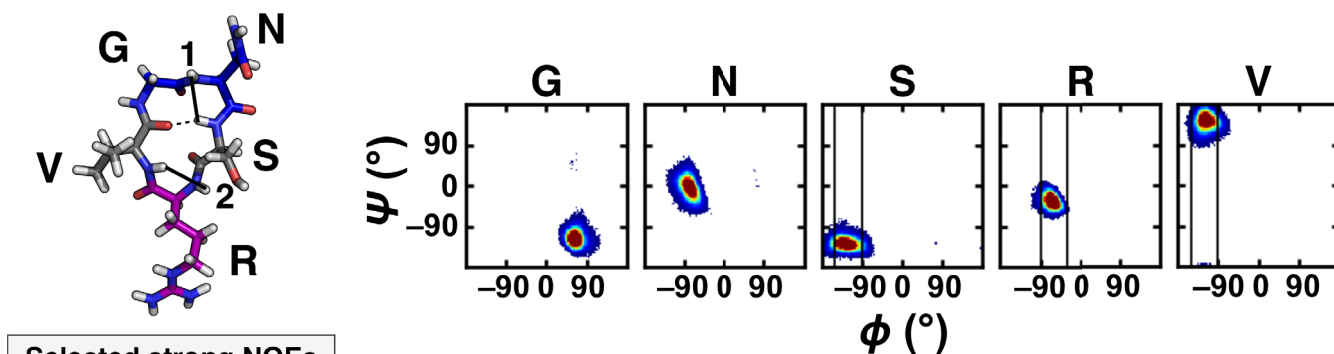

**Figure S6.** Correlations between predicted structure and experimental data. Shown are a representative structure and Ramachandran plots for the most populated cluster from simulations of cyclo-(GNSRV). Type II'  $\beta$ -turns and  $\alpha_R$  tight turns are shown in blue and purple, respectively. **(left)** Strong NOEs were observed between Asn<sup>2</sup>(H<sub>N</sub>) and Ser<sup>3</sup>(H<sub>N</sub>) and Arg<sup>4</sup>(H<sub>N</sub>) and Val<sup>5</sup>(H<sub>N</sub>). These are shown as black lines on the structure of cyclo-(GNSRV). **(right)**  $\phi$  angles were estimated from  $J$ -values for Ser<sup>3</sup>, Arg<sup>4</sup> and Val<sup>5</sup>. These are shown as solid vertical lines on the Ramachandran plot and are in agreement with the predicted structure.

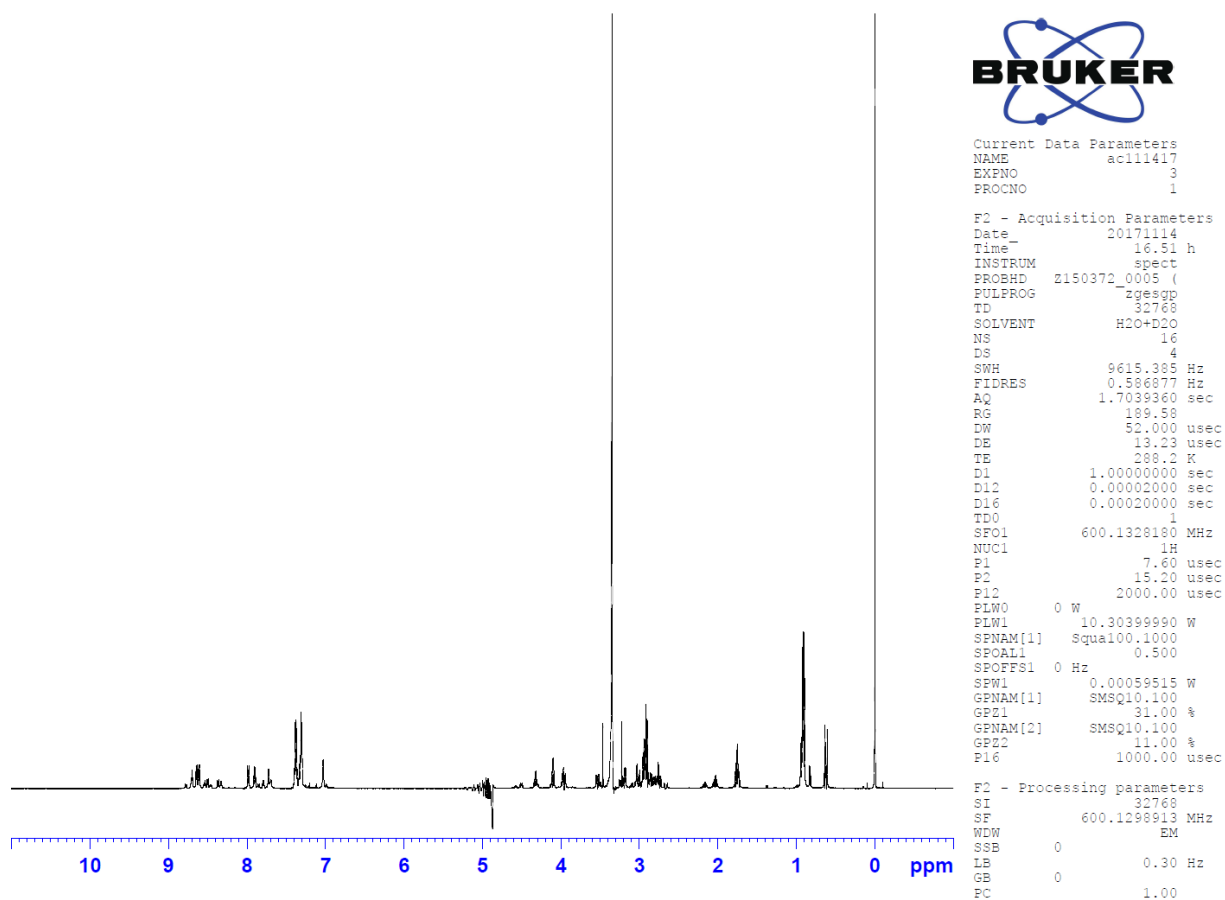

**Figure S7.**  $^1\text{H}$  NMR spectrum of cyclo-(GFDNV) in  $\text{H}_2\text{O}:\text{D}_2\text{O}$  (90:10) at 288 K.



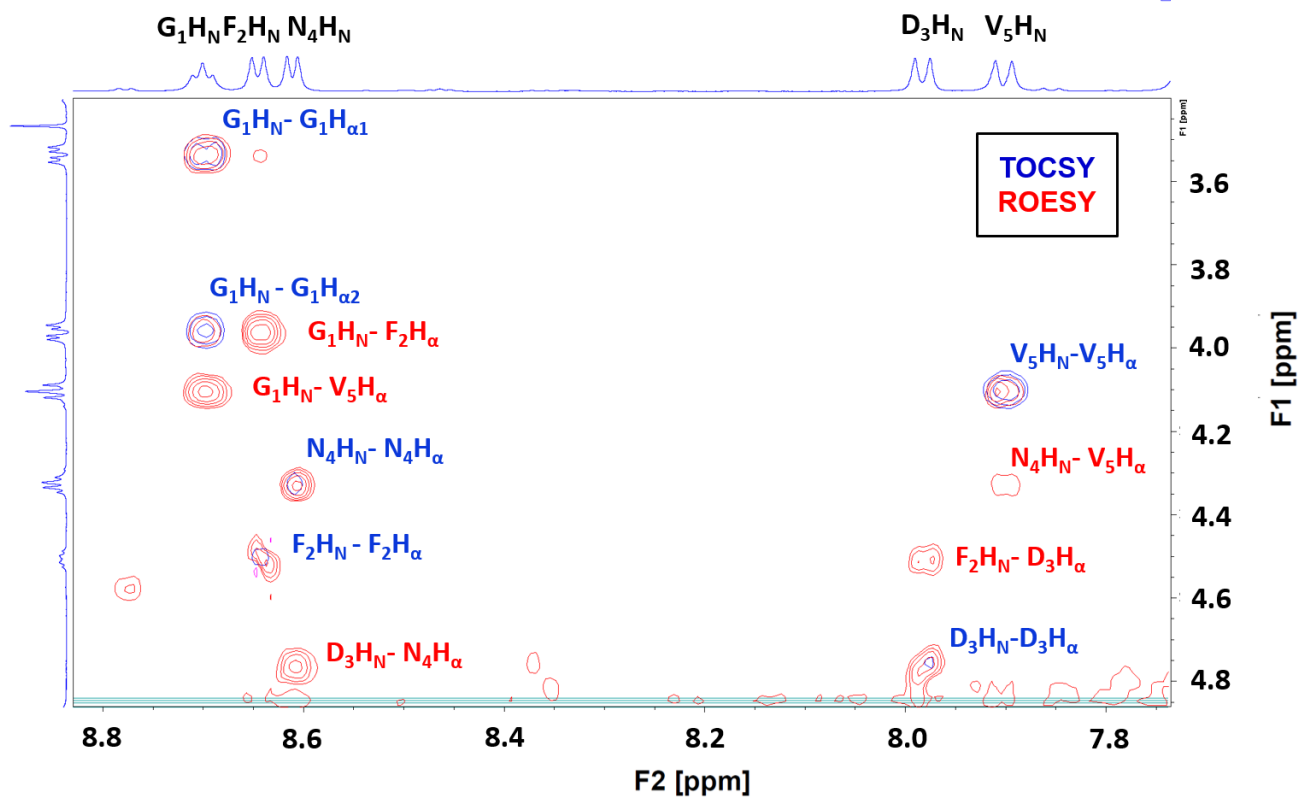

**Figure S8.** Fingerprint region of the 2D spectra for cyclo-(GFDNV). TOCSY peaks are shown in blue and ROESY peaks shown in red. 1D spectra correspond to the  $H_N$  region (top) and the  $H_{\alpha}$  region (left side). The peptide was dissolved in  $H_2O:D_2O$  (90:10) at a concentration of 3.5 mM at 288 K.

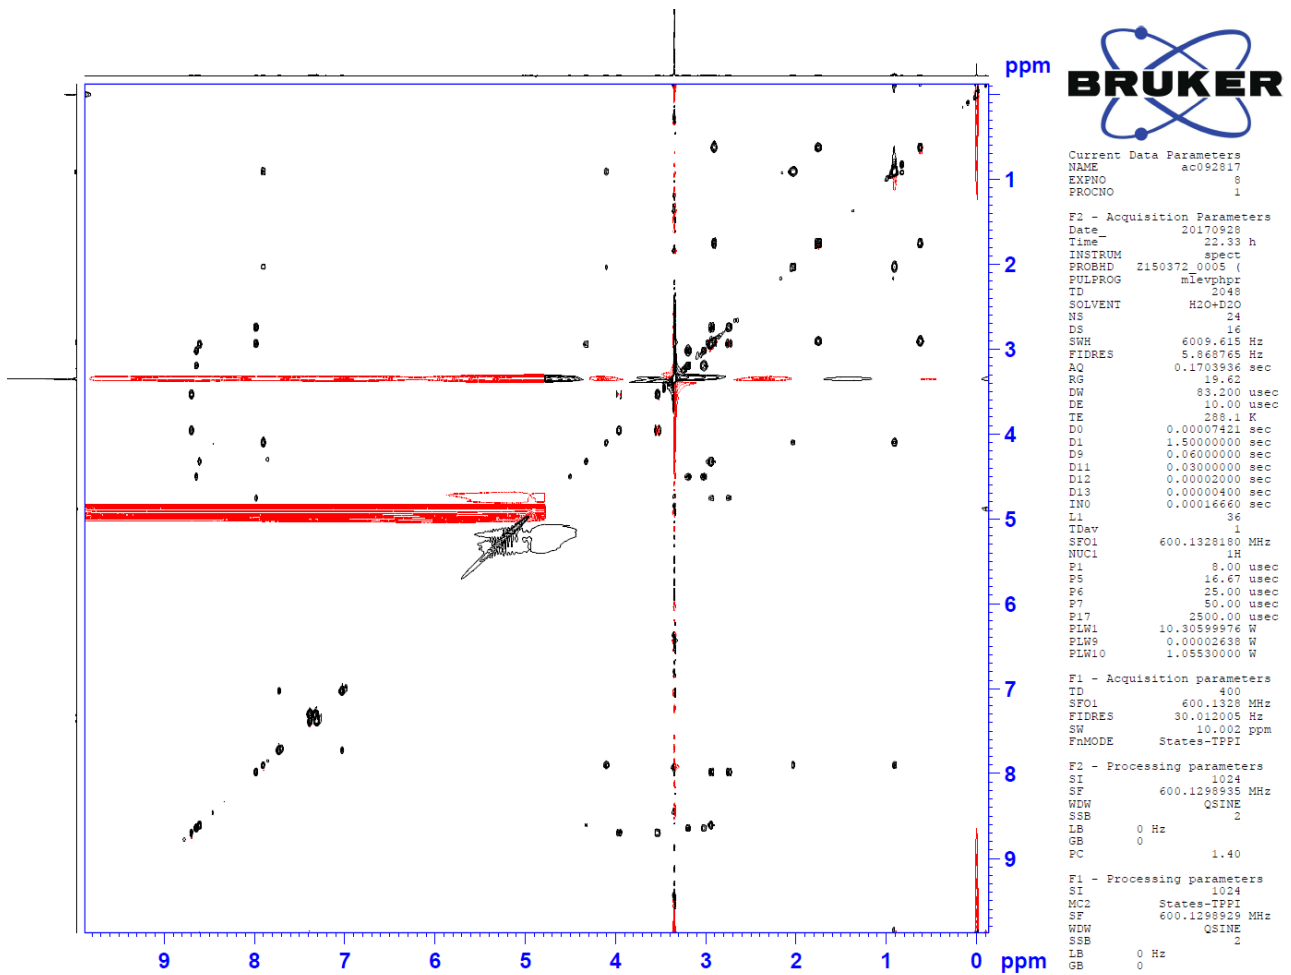

**Figure S9.** Full  $^1\text{H}$ - $^1\text{H}$  TOCSY spectrum of cyclo-(GFDNV) in H<sub>2</sub>O:D<sub>2</sub>O (90:10) at 288 K.

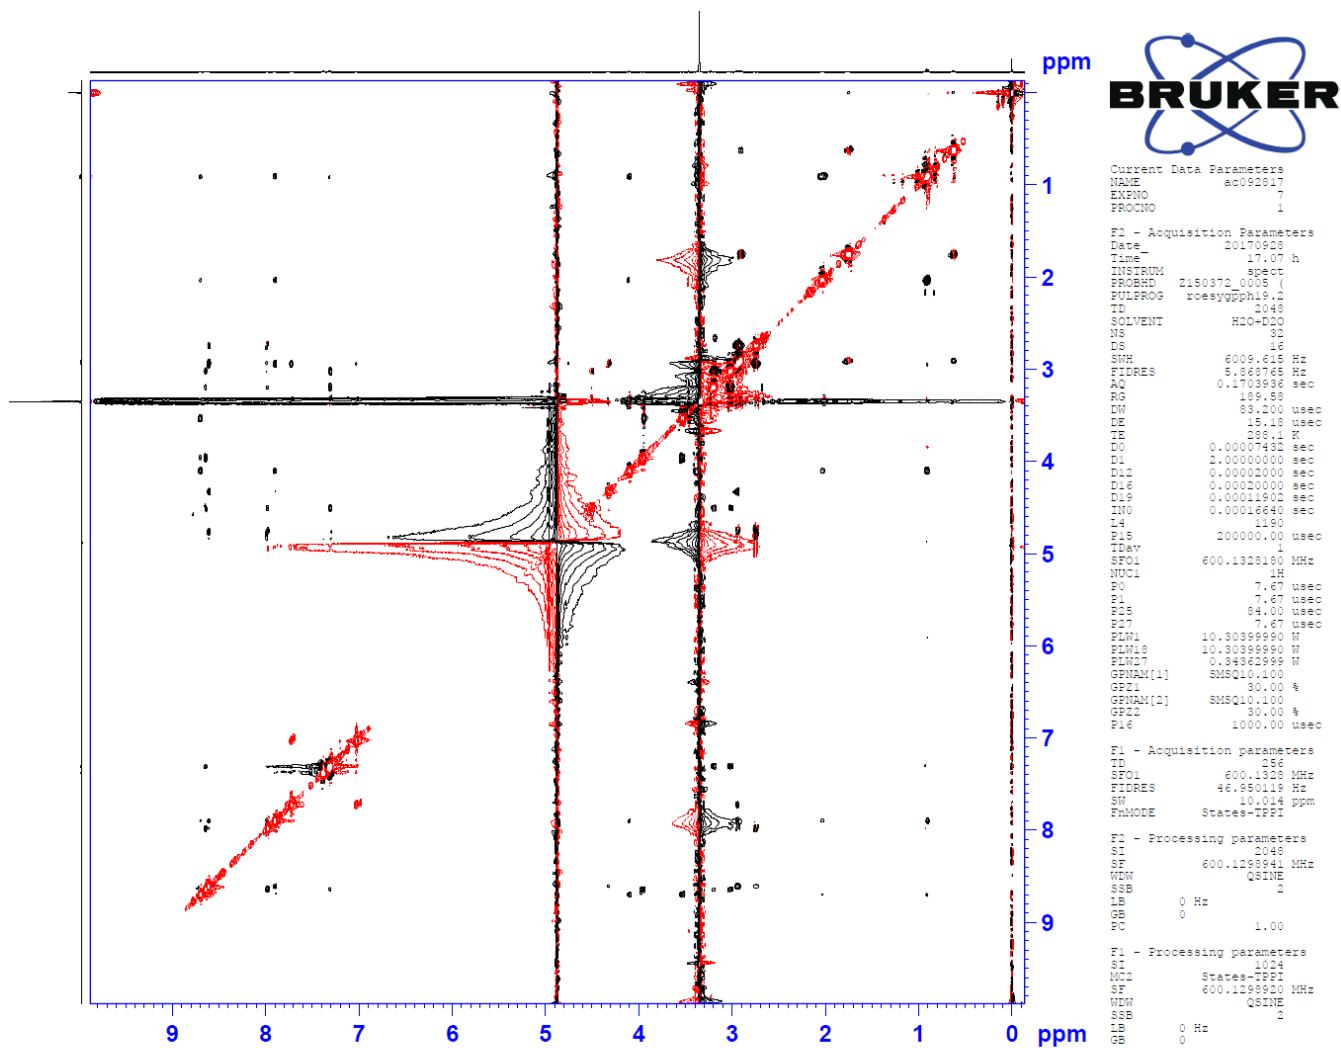

**Figure S10.** Full  $^1\text{H}$ - $^1\text{H}$  ROESY spectrum of cyclo-(GFDNV) in  $\text{H}_2\text{O}:\text{D}_2\text{O}$  (90:10) at 288 K.

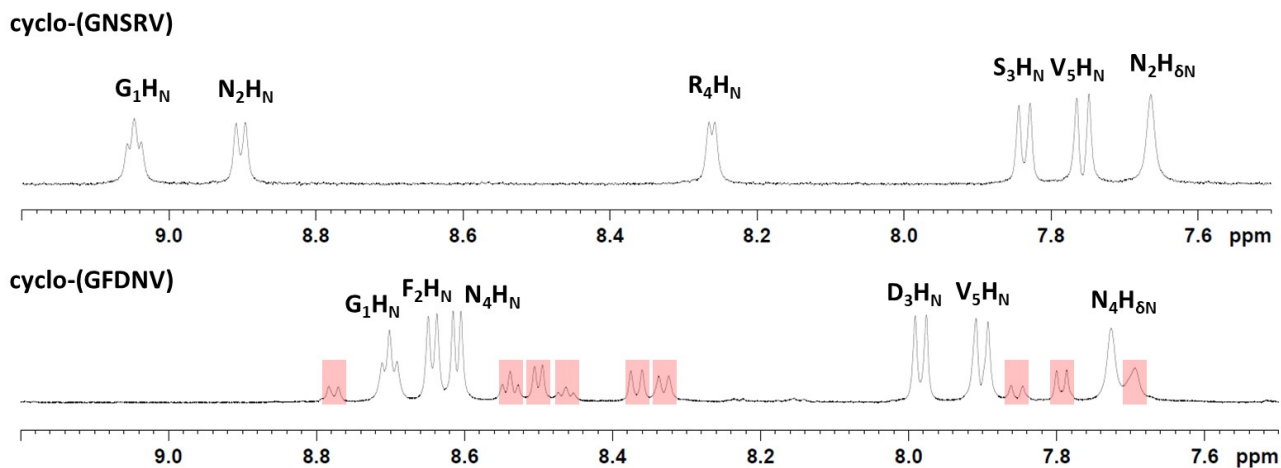

**Figure S11.** <sup>1</sup>H NMR spectra of H<sub>N</sub> region for cyclo-(GNSRV) (**top**) and cyclo-(GFDNV) (**bottom**) in H<sub>2</sub>O:D<sub>2</sub>O (90:10) at 288 K after NMR samples were incubated at room temperature for 6 weeks or longer. The spectrum for cyclo-(GFDNV) exhibits additional H<sub>N</sub> peaks, which are highlighted in red boxes. These increased in volume over time before saturating at the peak volumes shown. The total volume of the highlighted peaks represents roughly 33% of the total peak volume in the amide region.

## SUPPLEMENTARY TABLES

**Table S1.** Thermodynamics decomposition for cyclo-(GGGGG). Results use cut-off turn analysis (see Materials and Methods for analysis details). Type I, I', II and II'  $\beta$ -turns are shown in red, orange, green and blue, respectively. Tight turns  $\gamma$ ,  $\gamma'$ ,  $\alpha_R$ , and  $\alpha_L$  are shown in cyan, magenta, purple and brown, respectively. All thermodynamic terms are defined in the Materials and Methods. Populations and standard error of mean were calculated from the five neutral replicas of the S1 simulation.

|       |              | $\Delta G$               | $\Delta H$                       | $-T\Delta S$               | $\Delta H_P^{\text{vac}}$   | $\Delta H_{\text{rest}}$   | $-T\Delta S_P^{\text{conf}}$ | $-T\Delta S_W$                       |                                          |                                          |
|-------|--------------|--------------------------|----------------------------------|----------------------------|-----------------------------|----------------------------|------------------------------|--------------------------------------|------------------------------------------|------------------------------------------|
| GGGGG | 14.7 ± 0.6%  | 0.00                     | 0.00                             | 0.00                       | 0.00                        | 0.00                       | 0.00                         | 0.00                                 | 50<br>25<br>0<br>-25<br>-50<br>kJ/mol    |                                          |
| GGGGG | 14.3 ± 0.4%  | 0.09±0.04                | -0.26±0.53                       | 0.35±0.53                  | -0.07±0.11                  | -0.20±0.62                 | 0.35±0.29                    | -0.00±0.73                           |                                          |                                          |
| GGGGG | 6.4 ± 0.4%   | 2.11±0.09                | 1.69±1.03                        | 0.42±1.04                  | 18.82±0.06                  | -17.13±1.07                | 15.35±1.13                   | -14.92±1.32                          |                                          |                                          |
| GGGGG | 6.2 ± 0.5%   | 2.20±0.12                | 0.10±1.02                        | 2.10±0.92                  | 19.01±0.28                  | -18.90±0.82                | 16.28±1.29                   | -14.18±2.07                          |                                          |                                          |
| GGGGG | 5.4 ± 0.2%   | 2.51±0.07                | 2.94±1.71                        | -0.43±1.72                 | 9.88±0.20                   | -6.94±1.66                 | 23.36±0.76                   | -23.79±1.57                          |                                          |                                          |
| GGGGG | 4.9 ± 0.3%   | 2.78±0.06                | 5.71±0.76                        | -2.93±0.80                 | 9.88±0.12                   | -4.17±0.75                 | 28.41±1.31                   | -31.34±1.04                          |                                          |                                          |
| GGGGG | 2.6 ± 0.2%   | 4.33±0.12                | 4.41±2.25                        | -0.09±2.24                 | 4.43±0.27                   | -0.02±2.38                 | 70.18±3.03                   | -70.27±3.39                          |                                          |                                          |
| GGGGG | 2.4 ± 0.2%   | 4.51±0.14                | 2.04±0.64                        | 2.46±0.68                  | 5.03±0.33                   | -2.98±0.78                 | 77.00±4.44                   | -74.53±4.39                          |                                          |                                          |
| GGGGG | 1.3 ± 0.2%   | 6.02±0.20                | 9.08±3.24                        | -3.06±3.18                 | 0.09±0.28                   | 8.99±3.20                  | 160.30±13.72                 | -163.36±15.40                        |                                          |                                          |
| GGGGG | 1.3 ± 0.2%   | 6.20±0.21                | 9.65±3.80                        | -3.46±3.66                 | -0.11±0.52                  | 9.76±3.46                  | 171.59±14.29                 | -175.05±15.71                        |                                          |                                          |
| GGGGG | 1.1 ± 0.1%   | 6.55±0.13                | 7.78±1.76                        | -1.23±1.82                 | 1.71±0.43                   | 6.07±1.90                  | 194.34±8.78                  | -195.58±7.54                         |                                          |                                          |
| GGGGG | 1.0 ± 0.1%   | 6.70±0.11                | 13.07±4.46                       | -6.36±4.41                 | 1.39±0.50                   | 11.68±4.11                 | 205.33±6.30                  | -211.69±9.53                         |                                          |                                          |
| GGGGG | 0.73 ± 0.03% | 7.53±0.09                | 20.55±5.21                       | -13.02±5.13                | 1.20±0.84                   | 19.36±5.72                 | 269.75±5.15                  | -282.78±9.71                         |                                          |                                          |
| GGGGG | 0.65 ± 0.1%  | 7.85±0.23                | 18.07±1.98                       | -10.22±1.98                | -4.25±0.30                  | 22.32±2.03                 | 308.90±18.94                 | -319.13±19.10                        |                                          |                                          |
| GGGGG | 0.65 ± 0.1%  | 7.83±0.18                | 9.53±3.94                        | -1.69±3.83                 | 1.46±0.46                   | 8.07±3.88                  | 299.28±11.92                 | -300.98±14.81                        |                                          |                                          |
| GGGGG | 0.56 ± 0.1%  | 8.18±0.19                | 13.89±2.58                       | -5.71±2.63                 | -4.05±0.50                  | 17.94±2.42                 | 336.85±16.93                 | -342.56±16.65                        |                                          |                                          |
|       |              | $\Delta H_P^{\text{LJ}}$ | $\Delta H_P^{\text{EE(SR+1,4)}}$ | $\Delta H_P^{\text{bond}}$ | $\Delta H_P^{\text{angle}}$ | $\Delta H_P^{\text{dih.}}$ | $\Delta H_P^{\text{imp.}}$   | $\Delta H_{\text{rest}}^{\text{LJ}}$ | $\Delta H_{\text{rest}}^{\text{EE(SR)}}$ | $\Delta H_{\text{rest}}^{\text{EE(LR)}}$ |
| GGGGG | 14.7 ± 0.6%  | 0.00                     | 0.00                             | 0.00                       | 0.00                        | 0.00                       | 0.00                         | 0.00                                 | 0.00                                     | 0.00                                     |
| GGGGG | 14.3 ± 0.4%  | -0.05±0.06               | -0.01±0.06                       | 0.00±0.06                  | 0.08±0.09                   | -0.04±0.06                 | -0.05±0.01                   | 0.36±1.08                            | -0.62±0.96                               | 0.07±0.06                                |
| GGGGG | 6.4 ± 0.4%   | -3.65±0.07               | 12.60±0.05                       | -0.09±0.08                 | 2.98±0.07                   | 7.18±0.02                  | -0.20±0.05                   | -0.46±1.21                           | -14.77±1.95                              | -1.90±0.10                               |
| GGGGG | 6.2 ± 0.5%   | -3.68±0.07               | 12.78±0.17                       | 0.00±0.10                  | 2.96±0.13                   | 7.17±0.05                  | -0.23±0.04                   | -3.82±1.17                           | -13.29±1.68                              | -1.80±0.14                               |
| GGGGG | 5.4 ± 0.2%   | -0.82±0.10               | 6.76±0.13                        | -0.11±0.10                 | 0.13±0.09                   | 4.28±0.06                  | -0.36±0.03                   | -2.35±2.19                           | -2.86±3.53                               | -1.73±0.18                               |
| GGGGG | 4.9 ± 0.3%   | -0.80±0.02               | 6.84±0.19                        | -0.28±0.08                 | 0.04±0.06                   | 4.42±0.08                  | -0.36±0.02                   | -3.19±1.18                           | 0.65±1.58                                | -1.62±0.04                               |
| GGGGG | 2.6 ± 0.2%   | 0.16±0.07                | -2.40±0.16                       | 0.23±0.14                  | 2.46±0.16                   | 3.31±0.09                  | 0.67±0.08                    | 1.26±2.09                            | -0.60±2.78                               | -0.68±0.13                               |
| GGGGG | 2.4 ± 0.2%   | 0.16±0.12                | -2.31±0.18                       | 0.48±0.10                  | 2.54±0.23                   | 3.33±0.09                  | 0.82±0.03                    | -2.98±2.34                           | 0.53±3.08                                | -0.53±0.08                               |
| GGGGG | 1.3 ± 0.2%   | 1.26±0.17                | -8.81±0.58                       | -0.41±0.13                 | 0.96±0.37                   | 7.00±0.14                  | 0.08±0.09                    | 1.26±3.17                            | 10.23±5.12                               | -2.50±0.10                               |
| GGGGG | 1.3 ± 0.2%   | 1.31±0.14                | -8.96±0.36                       | -0.09±0.27                 | 0.43±0.25                   | 7.09±0.17                  | 0.11±0.05                    | 3.33±3.92                            | 8.33±7.11                                | -1.90±0.20                               |
| GGGGG | 1.1 ± 0.1%   | 1.15±0.18                | -10.09±0.32                      | 0.49±0.25                  | 2.69±0.27                   | 6.96±0.17                  | 0.52±0.07                    | -0.53±4.28                           | 8.70±4.01                                | -2.10±0.12                               |
| GGGGG | 1.0 ± 0.1%   | 1.32±0.16                | -10.45±0.28                      | 0.12±0.23                  | 2.90±0.37                   | 6.90±0.16                  | 0.59±0.10                    | 8.27±1.82                            | 5.47±5.55                                | -2.06±0.39                               |
| GGGGG | 0.73 ± 0.03% | -0.62±0.11               | -13.59±0.64                      | 0.31±0.26                  | 3.72±0.13                   | 10.45±0.24                 | 0.93±0.09                    | -16.20±2.52                          | 37.02±4.10                               | -1.47±0.42                               |
| GGGGG | 0.65 ± 0.1%  | 0.77±0.14                | -17.99±0.27                      | -0.22±0.20                 | 1.17±0.20                   | 11.77±0.12                 | 0.26±0.02                    | -0.41±6.60                           | 23.18±8.03                               | -0.45±0.27                               |
| GGGGG | 0.65 ± 0.1%  | -0.06±0.16               | -14.01±0.40                      | 0.04±0.19                  | 4.11±0.22                   | 10.64±0.10                 | 0.74±0.06                    | -4.23±5.02                           | 13.68±7.28                               | -1.37±0.18                               |
| GGGGG | 0.56 ± 0.1%  | 0.86±0.23                | -17.96±0.36                      | -0.04±0.25                 | 1.13±0.46                   | 11.61±0.19                 | 0.35±0.04                    | 2.27±5.96                            | 16.27±7.86                               | -0.60±0.21                               |

**Table S2.** Thermodynamics decomposition for cyclo-(AAAAA). Type I, I', II and II'  $\beta$ -turns are shown in red, orange, green and blue, respectively and distorted  $\beta$ -turns are underlined. The tight turn  $\alpha_R$  is shown in purple. All thermodynamic terms are defined in the Materials and Methods. Populations and standard error of mean were calculated from the five neutral replicas of the S1 simulation.

|              |             | $\Delta G$               | $\Delta H$                       | $-T\Delta S$               | $\Delta H_P^{\text{vac}}$   | $\Delta H_{\text{rest}}$   | $-T\Delta S_P^{\text{conf}}$ | $-T\Delta S_W$                       |                                          |                                          |
|--------------|-------------|--------------------------|----------------------------------|----------------------------|-----------------------------|----------------------------|------------------------------|--------------------------------------|------------------------------------------|------------------------------------------|
| <u>AAAAA</u> | 52.9 ± 0.7% | 0.00                     | 0.00                             | 0.00                       | 0.00                        | 0.00                       | 0.00                         | 0.00                                 |                                          |                                          |
| <u>AAAAA</u> | 30.6 ± 0.8% | 1.36±0.05                | 0.18±1.27                        | 1.19±1.28                  | 38.66±0.09                  | -38.49±1.27                | -3.30±0.12                   | 4.49±1.34                            |                                          |                                          |
| <u>AAAAA</u> | 2.2 ± 0.1%  | 7.96±0.09                | -3.11±2.00                       | 11.07±2.08                 | 14.19±0.24                  | -17.31±2.09                | 147.64±5.27                  | -136.57±3.88                         |                                          |                                          |
| <u>AAAAA</u> | 1.2 ± 0.2%  | 9.51±0.21                | -2.93±3.40                       | 12.44±3.27                 | 17.95±0.37                  | -20.88±3.21                | 279.74±21.08                 | -267.30±23.07                        |                                          |                                          |
|              |             |                          |                                  |                            |                             |                            |                              |                                      | kJ/mol                                   |                                          |
|              |             |                          |                                  |                            |                             |                            |                              |                                      |                                          |                                          |
|              |             | $\Delta H_P^{\text{LJ}}$ | $\Delta H_P^{\text{EE(SR+1,4)}}$ | $\Delta H_P^{\text{bond}}$ | $\Delta H_P^{\text{angle}}$ | $\Delta H_P^{\text{dih.}}$ | $\Delta H_P^{\text{imp.}}$   | $\Delta H_{\text{rest}}^{\text{LJ}}$ | $\Delta H_{\text{rest}}^{\text{EE(SR)}}$ | $\Delta H_{\text{rest}}^{\text{EE(LR)}}$ |
| <u>AAAAA</u> | 52.9 ± 0.7% | 0.00                     | 0.00                             | 0.00                       | 0.00                        | 0.00                       | 0.00                         | 0.00                                 | 0.00                                     | 0.00                                     |
| <u>AAAAA</u> | 30.6 ± 0.8% | -7.14±0.02               | 34.66±0.08                       | -1.09±0.07                 | -0.85±0.05                  | 13.67±0.04                 | -0.59±0.01                   | 0.48±0.70                            | -34.97±1.42                              | -4.00±0.04                               |
| <u>AAAAA</u> | 2.2 ± 0.1%  | 2.38±0.10                | 14.51±0.12                       | 0.54±0.20                  | 0.62±0.07                   | -3.81±0.04                 | -0.04±0.05                   | 0.73±0.74                            | -16.20±2.70                              | -1.84±0.12                               |
| <u>AAAAA</u> | 1.2 ± 0.2%  | -0.13±0.22               | 13.19±0.32                       | 0.38±0.15                  | 5.87±0.25                   | -1.99±0.17                 | 0.63±0.08                    | 7.84±2.34                            | -27.84±4.03                              | -0.89±0.13                               |

**Table S3.** Population and turn combination for the top three most populated clusters of cyclo-(X<sub>1</sub>AAAA) of the S1 simulations. Type I, I', II and II'  $\beta$ -turns are shown in red, orange, green and blue, respectively and distorted  $\beta$ -turns are underlined. The tight turn  $\alpha_R$  is shown in purple.

| AAAAA |              | CAAAA |       | DAAAA |              | EAAAA |              | FAAAA |       |
|-------|--------------|-------|-------|-------|--------------|-------|--------------|-------|-------|
| 53%   | AAAAA        | 18%   | CAAAA | 20%   | <u>DAAAA</u> | 14%   | EAAAA        | 18%   | FAAAA |
| 31%   | <u>AAAAA</u> | 13%   | CAAAA | 11%   | DAAAA        | 11%   | <u>EAAAA</u> | 15%   | FAAAA |
| 2%    | AAAAA        | 10%   | CAAAA | 9%    | <u>DAAAA</u> | 10%   | EAAAA        | 10%   | FAAAA |

| GAAAA |              | HAAAA |              | IAAAA |              | KAAAA |              | LAAAA |              |
|-------|--------------|-------|--------------|-------|--------------|-------|--------------|-------|--------------|
| 30%   | GAAAA        | 23%   | <u>HAAAA</u> | 30%   | IAAAA        | 13%   | <u>KAAAA</u> | 12%   | <u>LAAAA</u> |
| 11%   | GAAAA        | 21%   | HAAAA        | 16%   | <u>IAAAA</u> | 13%   | KAAAA        | 10%   | LAAAA        |
| 5%    | <u>GAAAA</u> | 16%   | HAAAA        | 10%   | IAAAA        | 10%   | KAAAA        | 9%    | LAAAA        |

| MAAAA |       | NAAAA |       | PAAAA |              | QAAAA |       | RAAAA |              |
|-------|-------|-------|-------|-------|--------------|-------|-------|-------|--------------|
| 20%   | MAAAA | 17%   | NAAAA | 32%   | PAAAA        | 23%   | QAAAA | 17%   | RAAAA        |
| 15%   | MAAAA | 13%   | NAAAA | 18%   | <u>PAAAA</u> | 15%   | QAAAA | 10%   | RAAAA        |
| 11%   | MAAAA | 8%    | NAAAA | 9%    | PAAAA        | 7%    | QAAAA | 9%    | <u>RAAAA</u> |

| SAAAA |       | TAAAA |              | VAAAA |              | WAAAA |              | YAAAA |              |
|-------|-------|-------|--------------|-------|--------------|-------|--------------|-------|--------------|
| 19%   | SAAAA | 12%   | TAAAA        | 36%   | VAAAA        | 19%   | WAAAA        | 23%   | YAAAA        |
| 13%   | SAAAA | 10%   | TAAAA        | 11%   | <u>VAAAA</u> | 10%   | WAAAA        | 10%   | YAAAA        |
| 12%   | SAAAA | 10%   | <u>TAAAA</u> | 8%    | VAAAA        | 9%    | <u>WAAAA</u> | 10%   | <u>YAAAA</u> |

**Table S4.** Population and turn combination for the top three most populated clusters of cyclo- $(X_1X_2AAA)$  of the S1 simulations. Type I, I', II and II'  $\beta$ -turns are shown in red, orange, green and blue, respectively and distorted  $\beta$ -turns are underlined. The tight turns  $\gamma$  and  $\alpha_R$  are shown in cyan and purple, respectively.

### GXAAA

| GGAAA |       | GAAAA |       | GVAAA |       | GFAAA |       | GRAAA |       | GDAAA |       | GNAAA |       | GSAAA |       |
|-------|-------|-------|-------|-------|-------|-------|-------|-------|-------|-------|-------|-------|-------|-------|-------|
| 24%   | GGAAA | 30%   | GAAAA | 23%   | GVAAA | 26%   | GFAAA | 41%   | GRAAA | 32%   | GDAAA | 40%   | GNAAA | 31%   | GSAAA |
| 11%   | GGAAA | 11%   | GAAAA | 7%    | GVAAA | 10%   | GFAAA | 8%    | GRAAA | 6%    | GDAAA | 11%   | GNAAA | 20%   | GSAAA |
| 8%    | GGAAA | 5%    | GAAAA | 6%    | GVAAA | 6%    | GFAAA | 6%    | GRAAA | 6%    | GDAAA | 2%    | GNAAA | 4%    | GSAAA |

### VXAAA

| VGAAA |       | VAAAA |       | VVAAA |       | VFAAA |       | VRAAA |       | VDAAA |       | VNAAA |       | VSAAA |       |
|-------|-------|-------|-------|-------|-------|-------|-------|-------|-------|-------|-------|-------|-------|-------|-------|
| 58%   | VGAAA | 36%   | VAAAA | 21%   | VVAAA | 18%   | VFAAA | 18%   | VRAAA | 49%   | VDAAA | 38%   | VNAAA | 53%   | VSAAA |
| 4%    | VGAAA | 11%   | VAAAA | 13%   | VVAAA | 18%   | VFAAA | 13%   | VRAAA | 21%   | VDAAA | 8%    | VNAAA | 7%    | VSAAA |
| 3%    | VGAAA | 8%    | VAAAA | 9%    | VVAAA | 14%   | VFAAA | 8%    | VRAAA | 2%    | VDAAA | 5%    | VNAAA | 6%    | VSAAA |

### FXAAA

| FGAAA |       | FAAAA |       | FVAAA |       | FFAAA |       | FRAAA |       | FDAAA |       | FNAAA |       | FSAAA |       |
|-------|-------|-------|-------|-------|-------|-------|-------|-------|-------|-------|-------|-------|-------|-------|-------|
| 37%   | FGAAA | 18%   | FAAAA | 20%   | FVAAA | 23%   | FFAAA | 17%   | FRAAA | 31%   | FDAAA | 24%   | FNAAA | 31%   | FSAAA |
| 10%   | FGAAA | 15%   | FAAAA | 11%   | FVAAA | 14%   | FFAAA | 9%    | FRAAA | 20%   | FDAAA | 17%   | FNAAA | 12%   | FSAAA |
| 6%    | FGAAA | 10%   | FAAAA | 9%    | FVAAA | 12%   | FFAAA | 9%    | FRAAA | 7%    | FDAAA | 7%    | FNAAA | 11%   | FSAAA |

### RXAAA

| RGAAA |       | RAAAA |       | RVAAA |       | RFAAA |       | RRAAA |       | RDAAA |       | RNAAA |       | RSAAA |       |
|-------|-------|-------|-------|-------|-------|-------|-------|-------|-------|-------|-------|-------|-------|-------|-------|
| 33%   | RGAAA | 17%   | RAAAA | 26%   | RVAAA | 15%   | RFAAA | 11%   | RRAAA | 22%   | RDAAA | 25%   | RNAAA | 35%   | RSAAA |
| 6%    | RGAAA | 10%   | RAAAA | 11%   | RVAAA | 11%   | RFAAA | 10%   | RRAAA | 21%   | RDAAA | 12%   | RNAAA | 14%   | RSAAA |
| 5%    | RGAAA | 9%    | RAAAA | 7%    | RVAAA | 11%   | RFAAA | 9%    | RRAAA | 6%    | RDAAA | 7%    | RNAAA | 7%    | RSAAA |

### DXAAA

| DGAAA |       | DAAAA |       | DVAAA |       | DFAAA |       | DRAAA |       | DDAAA |       | DNAAA |       | DSAAA |       |
|-------|-------|-------|-------|-------|-------|-------|-------|-------|-------|-------|-------|-------|-------|-------|-------|
| 12%   | DGAAA | 20%   | DAAAA | 19%   | DVAAA | 24%   | DFAAA | 21%   | DRAAA | 19%   | DDAAA | 31%   | DNAAA | 15%   | DSAAA |
| 12%   | DGAAA | 11%   | DAAAA | 14%   | DVAAA | 11%   | DFAAA | 20%   | DRAAA | 15%   | DDAAA | 6%    | DNAAA | 13%   | DSAAA |
| 11%   | DGAAA | 9%    | DAAAA | 11%   | DVAAA | 9%    | DFAAA | 7%    | DRAAA | 14%   | DDAAA | 5%    | DNAAA | 13%   | DSAAA |

### NXAAA

| NGAAA |       | NAAAA |       | NVAAA |       | NFAAA |       | NRAAA |       | NDAAA |       | NNAAA |       | NSAAA |       |
|-------|-------|-------|-------|-------|-------|-------|-------|-------|-------|-------|-------|-------|-------|-------|-------|
| 22%   | NGAAA | 17%   | NAAAA | 15%   | NVAAA | 18%   | NFAAA | 21%   | NRAAA | 18%   | NDAAA | 20%   | NNAAA | 20%   | NSAAA |
| 16%   | NGAAA | 13%   | NAAAA | 12%   | NVAAA | 9%    | NFAAA | 8%    | NRAAA | 17%   | NDAAA | 18%   | NNAAA | 18%   | NSAAA |
| 7%    | NGAAA | 8%    | NAAAA | 8%    | NVAAA | 8%    | NFAAA | 8%    | NRAAA | 12%   | NDAAA | 7%    | NNAAA | 12%   | NSAAA |

### SXAAA

| SGAAA |       | SAAAA |       | SVAAA |       | SFAAA |       | SRAAA |       | SDAAA |       | SNAAA |       | SSAAA |       |
|-------|-------|-------|-------|-------|-------|-------|-------|-------|-------|-------|-------|-------|-------|-------|-------|
| 29%   | SGAAA | 19%   | SAAAA | 15%   | SVAAA | 21%   | SFAAA | 28%   | SRAAA | 20%   | SDAAA | 31%   | SNAAA | 22%   | SSAAA |
| 10%   | SGAAA | 13%   | SAAAA | 15%   | SVAAA | 13%   | SFAAA | 10%   | SRAAA | 13%   | SDAAA | 10%   | SNAAA | 20%   | SSAAA |
| 7%    | SGAAA | 12%   | SAAAA | 10%   | SVAAA | 8%    | SFAAA | 7%    | SRAAA | 11%   | SDAAA | 8%    | SNAAA | 14%   | SSAAA |



**Table S5.** Highest scoring sequences from neighbor analysis of simulations of cyclo-(X<sub>1</sub>X<sub>2</sub>AAA), where X<sub>1</sub>/X<sub>2</sub> = G, V, F, R, D, N or S, for the β<sub>II</sub>+α<sub>R</sub> turn combination.

| Rank | CP    | Score | Rank | CP    | Score |
|------|-------|-------|------|-------|-------|
| 1    | GNSRV | 1.287 | 11   | GRSDV | 1.191 |
| 2    | GRSRV | 1.265 | 12   | GRSFV | 1.188 |
| 3    | GNSVV | 1.235 | 13   | SNSRV | 1.184 |
| 4    | GSSRV | 1.226 | 14   | GNRVV | 1.178 |
| 5    | GNSRV | 1.220 | 15   | GRRRV | 1.177 |
| 6    | GDSRV | 1.215 | 16   | GRNRV | 1.175 |
| 7    | GRSVV | 1.213 | 17   | GSSVV | 1.174 |
| 8    | GNSDV | 1.213 | 18   | GNFRV | 1.165 |
| 9    | GNNRV | 1.211 | 19   | GDSVV | 1.163 |
| 10   | GNSFV | 1.210 | 20   | GNGRV | 1.162 |

**Table S6.** Thermodynamics decomposition for (A) cyclo-(GNSRV), (B) cyclo-(GNAAA), (C) cyclo-(ANSAA), (D) cyclo-(AASRA), (E) cyclo-(AAARV) and (F) cyclo-(GAAAV). Type I, I' and II' β-turns are shown in red, orange and blue, respectively and distorted β-turns are underlined. The tight turns γ and α<sub>R</sub> are shown in cyan and purple, respectively. In B–F, arrows indicate the turn combination that is at same location as in cyclo-(GNSRV). For A–B and E–F, boxes indicate factors that stabilize the most populated conformation. In C–D, the factors that stabilize the most populated conformation over others is undetermined as the error is larger than the average. All thermodynamic terms are defined in the Materials and Methods. Populations and standard error of mean were calculated from the five neutral replicas of the S1 simulations.

|             | $\Delta G$ | $\Delta H$        | $-T\Delta S$      | $\Delta H_P^{nc}$  | $\Delta H_{rest}$  | $-T\Delta S_P^{conf}$ | $-T\Delta S_W$      | $\Delta H_P^{I'}$ | $\Delta H_P^{EE(SR+1.4)}$ | $\Delta H_P^{bond}$ | $\Delta H_P^{angle}$ | $\Delta H_P^{dih.}$ | $\Delta H_P^{imp.}$ | $\Delta H_{rest}^{LJ}$ | $\Delta H_{rest}^{EE(SR)}$ | $\Delta H_{rest}^{EE(LR)}$ |      |      |
|-------------|------------|-------------------|-------------------|--------------------|--------------------|-----------------------|---------------------|-------------------|---------------------------|---------------------|----------------------|---------------------|---------------------|------------------------|----------------------------|----------------------------|------|------|
| <b>(A)</b>  |            |                   |                   |                    |                    |                       |                     |                   |                           |                     |                      |                     |                     |                        |                            |                            |      |      |
| GNSRV 67.4% | 0.00       | 0.00              | 0.00              | 0.00               | 0.00               | 0.00                  | 0.00                | 0.00              | 0.00                      | 0.00                | 0.00                 | 0.00                | 0.00                | 0.00                   | 0.00                       | 0.00                       | 0.00 | 0.00 |
| GNSRV 7.6%  | 5.43±0.08  | 3.36±1.33         | 2.07±1.29         | <u>-29.34±0.65</u> | <u>32.70±1.26</u>  | 51.15±1.58            | -49.08±2.44         | -5.40±0.19        | <u>-39.91±0.76</u>        | 0.98±0.08           | 3.59±0.10            | <u>11.43±0.17</u>   | -0.03±0.04          | <u>7.19±2.37</u>       | <u>19.37±3.11</u>          | <u>6.1±0.65</u>            |      |      |
| GNSRV 4.9%  | 6.57±0.13  | 5.21±2.57         | 1.36±2.56         | <u>11.91±1.04</u>  | <u>-6.71±2.87</u>  | <u>82.00±4.92</u>     | <u>-80.64±5.76</u>  | 0.66±0.19         | <u>-6.71±0.83</u>         | <u>-0.23±0.10</u>   | <u>2.77±0.10</u>     | <u>15.16±0.19</u>   | 0.26±0.07           | <u>3.97±2.51</u>       | <u>-1.69±3.96</u>          | <u>-8.99±0.87</u>          |      |      |
| <b>(B)</b>  |            |                   |                   |                    |                    |                       |                     |                   |                           |                     |                      |                     |                     |                        |                            |                            |      |      |
| GNAAA 40.4% | 0.00       | 0.00              | 0.00              | 0.00               | 0.00               | 0.00                  | 0.00                | 0.00              | 0.00                      | 0.00                | 0.00                 | 0.00                | 0.00                | 0.00                   | 0.00                       | 0.00                       | 0.00 | 0.00 |
| GNAAA 11.0% | 3.25±0.10  | 3.95±1.78         | -0.69±1.75        | <u>-1.43±0.42</u>  | <u>5.38±2.06</u>   | <u>16.68±0.74</u>     | <u>-17.38±2.01</u>  | 0.07±0.06         | <u>-7.01±0.41</u>         | 0.73±0.07           | <u>5.67±0.12</u>     | -1.12±0.04          | 0.22±0.03           | -0.14±1.15             | <u>2.98±2.69</u>           | <u>2.25±0.33</u>           |      |      |
| GNAAA 2.3%  | 7.11±0.09  | <u>11.36±1.63</u> | <u>-4.25±1.66</u> | <u>-95.41±1.34</u> | <u>66.77±2.41</u>  | <u>131.08±5.37</u>    | <u>-135.33±4.82</u> | -5.84±0.27        | <u>-60.92±1.23</u>        | 0.67±0.13           | 1.07±0.14            | 8.98±0.27           | 0.63±0.07           | <u>5.02±2.61</u>       | <u>26.71±3.28</u>          | <u>35.04±0.65</u>          |      |      |
| <b>(C)</b>  |            |                   |                   |                    |                    |                       |                     |                   |                           |                     |                      |                     |                     |                        |                            |                            |      |      |
| ANSAA 19.9% | 0.00       | 0.00              | 0.00              | 0.00               | 0.00               | 0.00                  | 0.00                | 0.00              | 0.00                      | 0.00                | 0.00                 | 0.00                | 0.00                | 0.00                   | 0.00                       | 0.00                       | 0.00 | 0.00 |
| ANSAA 18.1% | 0.23±0.03  | 0.86±0.85         | -0.63±0.87        | <u>-12.28±0.54</u> | <u>13.14±0.81</u>  | <u>-1.37±0.29</u>     | 0.74±0.73           | -0.26±0.07        | <u>-9.35±0.67</u>         | -0.28±0.07          | 0.62±0.14            | -2.91±0.15          | -0.10±0.04          | <u>-3.33±0.86</u>      | <u>6.88±0.92</u>           | <u>9.56±0.75</u>           |      |      |
| ANSAA 12.1% | 1.25±0.06  | 0.34±1.28         | 0.91±1.27         | <u>-16.29±0.94</u> | <u>16.63±1.88</u>  | <u>-7.79±0.66</u>     | <u>-6.88±1.52</u>   | 1.22±0.08         | <u>-15.77±0.86</u>        | 0.07±0.05           | 1.91±0.07            | -3.75±0.06          | 0.04±0.03           | <u>-0.05±0.95</u>      | <u>6.77±1.96</u>           | <u>9.86±0.83</u>           |      |      |
| <b>(D)</b>  |            |                   |                   |                    |                    |                       |                     |                   |                           |                     |                      |                     |                     |                        |                            |                            |      |      |
| AASRA 28.1% | 0.00       | 0.00              | 0.00              | 0.00               | 0.00               | 0.00                  | 0.00                | 0.00              | 0.00                      | 0.00                | 0.00                 | 0.00                | 0.00                | 0.00                   | 0.00                       | 0.00                       | 0.00 | 0.00 |
| AASRA 10.3% | 2.50±0.07  | 0.48±2.15         | 2.03±2.15         | 3.11±0.40          | <u>-2.63±2.15</u>  | <u>21.63±0.66</u>     | <u>-19.60±2.30</u>  | 0.03±0.08         | 1.14±0.41                 | 0.10±0.16           | 0.85±0.17            | 0.80±0.08           | 0.18±0.03           | <u>2.80±1.51</u>       | <u>-4.19±3.44</u>          | <u>-1.2±0.38</u>           |      |      |
| AASRA 6.7%  | 3.60±0.08  | 1.09±1.42         | 2.50±1.47         | <u>17.10±0.61</u>  | <u>-16.01±1.12</u> | <u>44.10±1.95</u>     | <u>-41.59±1.54</u>  | -1.36±0.12        | <u>15.66±0.23</u>         | -0.41±0.15          | -1.61±0.21           | 4.81±0.21           | -0.00±0.04          | <u>0.65±1.69</u>       | <u>-8.41±2.18</u>          | <u>-8.2±0.27</u>           |      |      |
| <b>(E)</b>  |            |                   |                   |                    |                    |                       |                     |                   |                           |                     |                      |                     |                     |                        |                            |                            |      |      |
| AAARV 25.8% | 0.00       | 0.00              | 0.00              | 0.00               | 0.00               | 0.00                  | 0.00                | 0.00              | 0.00                      | 0.00                | 0.00                 | 0.00                | 0.00                | 0.00                   | 0.00                       | 0.00                       | 0.00 | 0.00 |
| AAARV 11.1% | 2.11±0.07  | 9.65±1.39         | -7.54±1.46        | <u>-5.78±0.20</u>  | <u>15.43±1.44</u>  | <u>18.46±0.81</u>     | <u>-26.01±0.78</u>  | 2.61±0.10         | <u>-17.01±0.22</u>        | 0.35±0.14           | 4.14±0.11            | 3.77±0.06           | 0.36±0.04           | <u>3.92±0.99</u>       | <u>12.66±2.31</u>          | <u>-1.15±0.18</u>          |      |      |
| AAARV 6.9%  | 3.29±0.06  | 2.12±0.65         | 1.16±0.65         | <u>-41.94±0.29</u> | <u>39.81±0.72</u>  | <u>35.14±1.14</u>     | <u>-33.97±1.62</u>  | -6.05±0.15        | <u>34.55±0.33</u>         | -0.31±0.12          | -0.76±0.11           | <u>15.29±0.07</u>   | -0.79±0.03          | <u>3.93±0.85</u>       | <u>41.76±1.30</u>          | <u>-1.99±0.36</u>          |      |      |
| <b>(F)</b>  |            |                   |                   |                    |                    |                       |                     |                   |                           |                     |                      |                     |                     |                        |                            |                            |      |      |
| GAAAV 58.0% | 0.00       | 0.00              | 0.00              | 0.00               | 0.00               | 0.00                  | 0.00                | 0.00              | 0.00                      | 0.00                | 0.00                 | 0.00                | 0.00                | 0.00                   | 0.00                       | 0.00                       | 0.00 | 0.00 |
| GAAAV 4.1%  | 6.63±0.08  | <u>12.37±2.50</u> | <u>-5.74±2.53</u> | 0.09±0.30          | <u>12.27±2.74</u>  | <u>68.30±3.09</u>     | <u>-74.04±3.21</u>  | 2.59±0.16         | <u>-11.34±0.32</u>        | -0.21±0.08          | 2.91±0.21            | 5.63±0.12           | 0.50±0.07           | -0.94±2.10             | <u>12.13±3.18</u>          | <u>1.07±0.20</u>           |      |      |
| GAAAV 3.5%  | 7.03±0.03  | 7.10±1.80         | -0.08±1.80        | -0.78±0.39         | 7.88±1.59          | <u>88.28±1.30</u>     | <u>-88.36±1.79</u>  | 2.42±0.12         | <u>-11.43±0.19</u>        | 0.59±0.10           | 1.96±0.14            | 5.49±0.05           | 0.17±0.01           | <u>-2.89±2.46</u>      | <u>2.01±3.14</u>           | <u>8.76±0.21</u>           |      |      |

**Table S7.** Observed NOEs for cyclo-(GNSRV).

| <b>Coordinate 1</b> | <b>Assignment1</b> | <b>Coordinate 2</b> | <b>Assignment 2</b> | <b>Strength</b> |
|---------------------|--------------------|---------------------|---------------------|-----------------|
| 9.05                | 1Gly-NH            | 3.63                | 1Gly-Haa            | strong          |
| 9.05                | 1Gly-NH            | 3.97                | 1Gly-Hab            | strong          |
| 8.91                | 2Asn-NH            | 4.70                | 2Asn-Ha             | strong          |
| 8.26                | 4Arg-NH            | 4.03                | 4Arg-Ha             | strong          |
| 7.84                | 3Ser-NH            | 4.61                | 3Ser-Ha             | strong          |
| 7.84                | 3Ser-NH            | 3.90                | 3Ser-Hb             | strong          |
| 7.76                | 5Val-NH            | 4.18                | 5Val-Ha             | strong          |
|                     |                    |                     |                     |                 |
| 9.05                | 1Gly-NH            | 4.17                | 5Val-Ha             | strong          |
| 8.91                | 2Asn-NH            | 3.98                | 1Gly-Hab            | strong          |
| 8.26                | 4Arg-NH            | 3.91                | 3Ser-Hb             | weak            |
| 8.26                | 4Arg-NH            | 4.61                | 3Ser-Ha             | strong          |
|                     |                    |                     |                     |                 |
| 7.28                | 4Arg-NHe           | 4.02                | 4Arg-Ha             | weak            |
| 7.27                | 4Arg-NHe           | 3.25                | 4Arg-Hd             | strong          |
|                     |                    |                     |                     |                 |
| 8.90                | 2Asn-NH            | 2.88                | 2Asn-Hb             | strong          |
| 8.27                | 4Arg-NH            | 1.95                | 4Arg-Hba            | strong          |
| 8.27                | 4Arg-NH            | 1.71                | 4Arg-Hbb            | weak            |
| 8.27                | 4Arg-NH            | 1.64                | 4Arg-Hg             | weak            |
| 7.76                | 5Val-NH            | 1.96                | 5Val-Hb             | strong          |
| 7.76                | 5Val-NH            | 0.93                | 5Val-Hga            | strong          |
| 7.76                | 5Val-NH            | 0.86                | 5Val-Hgb            | strong          |
|                     |                    |                     |                     |                 |
| 7.28                | 4Arg-NHe           | 1.96                | 4Arg-Hba            | weak            |
| 7.27                | 4Arg-NHe           | 1.73                | 4Arg-Hbb            | strong          |
| 7.27                | 4Arg-NHe           | 1.65                | 4Arg-Hg             | strong          |
|                     |                    |                     |                     |                 |
| 8.90                | 2Asn-NH            | 7.83                | 3Ser-NH             | strong          |
| 8.27                | 4Arg-NH            | 7.75                | 5Val-NH             | strong          |
|                     |                    |                     |                     |                 |
| 4.60                | 3Ser-Ha            | 3.91                | 3Ser-Hb             | strong          |
| 4.70                | 2Asn-Ha            | 2.86                | 2Asn-Hb             | strong          |
| 3.98                | 1Gly-Hab           | 3.63                | 1Gly-Haa            | strong          |
| 4.03                | 4Arg-Ha            | 3.25                | 4Arg-Hd             | strong          |
| 4.18                | 5Val-Ha            | 1.95                | 5Val-Hb             | strong          |
| 4.03                | 4Arg-Ha            | 1.95                | 4Arg-Hba            | strong          |
| 4.03                | 4Arg-Ha            | 1.17                | 4Arg-Hbb            | strong          |
| 4.03                | 4Arg-Ha            | 1.66                | 4Arg-Hg             | strong          |
| 4.18                | 5Val-Ha            | 0.92                | 5Val-Hga            | strong          |
| 4.18                | 5Val-Ha            | 0.88                | 5Val-Hgb            | strong          |
| 3.25                | 4Arg-Hd            | 1.95                | 4Arg-Hbb            | strong          |
| 3.25                | 4Arg-Hd            | 1.69                | 4Arg-Hg             | strong          |
| 1.95                | 4Arg-Hba           | 1.71                | 4Arg-Hbb            | strong          |
| 1.94                | 4Arg-Hba           | 1.65                | 4Arg-Hg             | strong          |

|      |         |      |          |        |
|------|---------|------|----------|--------|
| 1.97 | 5Val-Hb | 0.93 | 5Val-Hga | strong |
| 1.97 | 5Val-Hb | 0.88 | 5Val-Hgb | strong |

**Table S8.**  $J$ -coupling values and associated torsional restraints for cyclo-(GNSRV).

| Residue        | $^3J_{\text{NH-CH}\alpha}$ (Hz) | $\phi$ restraints   |
|----------------|---------------------------------|---------------------|
| G <sub>1</sub> | 5.3                             | –                   |
| N <sub>2</sub> | 7.7                             | –                   |
| S <sub>3</sub> | 9.1                             | $-120 \pm 30^\circ$ |
| R <sub>4</sub> | 4.8                             | $-60 \pm 30^\circ$  |
| V <sub>5</sub> | 9.3                             | $-120 \pm 30^\circ$ |

**Table S9.** Observed NOEs for cyclo-(GFDNV).

| Coordinate1 | Assignment1 | Coordinate 2 | Assignment 2 | Strength |
|-------------|-------------|--------------|--------------|----------|
| 8.70        | 1Gly-NH     | 7.90         | 5Val-NH      | weak     |
| 8.61        | 4Asn-NH     | 7.90         | 5Val-NH      | strong   |
| 8.64        | 2Phe-NH     | 7.99         | 3Asp-NH      | strong   |
| 8.61        | 4Asn-NH     | 7.99         | 3Asp-NH      | weak     |
|             |             |              |              |          |
| 8.61        | 4Asn-NH     | 2.75         | 3Asp-Hba     | strong   |
| 7.98        | 3Asp-NH     | 3.20         | 2Phe-Hbb     | weak     |
| 7.98        | 3Asp-NH     | 3.03         | 2Phe-Hba     | weak     |
| 7.90        | 5Val-NH     | 2.93         | 3Asp-Hbb     | strong   |
| 8.70        | 1Gly-NH     | 2.04         | 5Val-Hb      | weak     |
| 8.70        | 1Gly-NH     | 0.91         | 5Val-Hga     | strong   |
| 7.32        | 2Phe-Hd     | 0.92         | 5Val-Hgb     | weak     |
|             |             |              |              |          |
| 8.70        | 1Gly-NH     | 4.11         | 5Val-Ha      | strong   |
| 8.64        | 2Phe-NH     | 3.95         | 1Gly-Hab     | strong   |
| 7.90        | 5Val-NH     | 4.33         | 4Asn-Ha      | weak     |
| 7.98        | 3Asp-NH     | 4.51         | 2Phe-Ha      | strong   |
| 8.61        | 4Asn-NH     | 4.77         | 3Asp-Ha      | strong   |
|             |             |              |              |          |
| 8.65        | 2Phe-NH     | 3.19         | 2Phe-Hbb     | strong   |
| 8.64        | 2Phe-NH     | 3.03         | 2Phe-Hba     | strong   |
| 8.61        | 4Asn-NH     | 2.94         | 4Asn-Hba     | strong   |
| 7.98        | 3Asp-NH     | 2.93         | 3Asp-Hbb     | strong   |
| 7.98        | 3Asp-NH     | 2.74         | 3Asp-Hba     | strong   |
| 8.64        | 2Phe-NH     | 7.31         | 2Phe-Hd      | strong   |
| 7.31        | 2Phe-Hd     | 3.20         | 2Phe-Hbb     | strong   |
| 7.30        | 2Phe-Hd     | 3.03         | 2Phe-Hba     | strong   |
|             |             |              |              |          |
| 7.90        | 5Val-NH     | 0.91         | 5Val-Hga     | strong   |
| 7.90        | 5Val-NH     | 2.04         | 5Val-Hb      | strong   |
|             |             |              |              |          |
| 3.96        | 1Gly-Hab    | 3.54         | 1Gly-Haa     | strong   |

|      |          |      |          |        |
|------|----------|------|----------|--------|
| 4.50 | 2Phe-Ha  | 3.21 | 2Phe-Hbb | strong |
| 4.51 | 2Phe-Ha  | 3.03 | 2Phe-Hba | strong |
| 4.33 | 4Asn-Ha  | 2.95 | 4Asn-Hba | strong |
| 4.11 | 5Val-Ha  | 2.04 | 5Val-Hb  | strong |
| 4.10 | 5Val-Ha  | 0.92 | 5Val-Hga | strong |
| 3.20 | 2Phe-Hbb | 3.02 | 2Phe-Hba | strong |
| 2.04 | 5Val-Hb  | 0.91 | 5Val-Hga | strong |
| 2.94 | 3Asp-Hbb | 2.75 | 3Asp-Hba | strong |

**Table S10.** *J*-coupling values and associated torsional restraints for cyclo-(GFDNV).

| <b>Residue</b> | <b><math>^3J_{\text{NH-CH}\alpha}</math> (Hz)</b> | <b><math>\phi</math> restraints</b> |
|----------------|---------------------------------------------------|-------------------------------------|
| G <sub>1</sub> | 6.1                                               | –                                   |
| F <sub>2</sub> | 7.0                                               | –                                   |
| D <sub>3</sub> | 8.9                                               | $-120 \pm 30^\circ$                 |
| N <sub>4</sub> | 6.5                                               | –                                   |
| V <sub>5</sub> | 9.7                                               | $-120 \pm 30^\circ$                 |
